1 **Evidence for absence of bilateral transfer of olfactory learned information in *Apis***  
2 ***dorsata* and *Apis mellifera***

3  
4 **Meenakshi Vijaykumar<sup>1,2</sup> Sandhya Mogily<sup>1</sup> Aparna Dutta-Gupta<sup>2</sup> Joby Joseph<sup>1\*</sup>**

5  
6 <sup>1</sup> Centre for Neural and Cognitive Sciences, University of Hyderabad, Gachibowli, Hyderabad-  
7 500046

8  
9 <sup>2</sup> Department of Animal Biology, University of Hyderabad, Gachibowli, Hyderabad-500046  
10

11 <sup>\*</sup> Corresponding Author Email: [jjcnscs@uohyd.ac.in](mailto:jjcnscs@uohyd.ac.in)

12  
13  
14 **Key Words:** *Apis dorsata*, *Apis mellifera*, Bilateral transfer, Insect olfaction, Learning and  
15 memory

16  
17  
18  
19  
20  
21  
22  
23  
24  
25  
26  
27  
28  
29  
30  
31  
32  
33  
34  
35  
36

37

38

39

40

## Summary Statement

41

42

43 The two halves of honeybee brain store and retrieve olfactory associative memories  
44 independently.

45

46

47

48

49

50

51

52

53

54

55

56

57

58

59

60

61

62

63

64

65

66

67

68

69

70

71 **Abstract:**

72 **Capacity and condition under which lateral transfer of olfactory memory is possible in**  
73 **insects are still debated. Here we present evidence consistent with lack of ability to**  
74 **transfer olfactory associative memory in two species of honeybees, *Apis mellifera***  
75 **and *Apis dorsata* in a PER associative conditioning paradigm where the untrained**  
76 **antenna is blocked by an insulating coat. We show that the olfactory system on each**  
77 **side of the bee can learn and retrieve independently and the retrieval using the**  
78 **antenna on the side contralateral to the trained one is not affected by the training.**  
79 **Recreating the paradigm in which the memory on the contralateral side has been**  
80 **reported at three hours after training we see that the memory is available on the**  
81 **contralateral side immediately after training and moreover, training with trained side**  
82 **antenna coated with insulator does not prevent learning, pointing to a possible**  
83 **insufficiency of block of odor stimuli in this paradigm. Bee does not learn the odor**  
84 **stimuli applied to one side alone as a stimulus different from odor presented to both**  
85 **sides. Moreover the behaviour of the bee as a whole can be predicted if the sides are**  
86 **assumed to learn and store independently and the organism as a whole is able to**  
87 **retrieve the memory if either of the sides have learned.**

88 **Introduction:**

89 Lateral transfer of information helps environmental stimuli acquired, and learnt on one side  
90 to become accessible to both lobes of a bilateral brain (Aboitiz and Montiel, 2003; Gazzaniga,  
91 2000). This aids maximizing the computational ability of the brain by allowing each side of  
92 the brain to co-opt the other for joint decision or avoid duplicity of storage for efficient use of  
93 the substrate (Aboitiz and Montiel, 2003; Gazzaniga, 2000; Gazzaniga, 2014). Information  
94 transfer across the midline has also been theorised to be the basis of unified consciousness  
95 (Barron and Klein, 2016) and its importance has been highlighted in split-brain patients

96 (Gazzaniga, 2014). In higher mammals, this crucial function is carried out by the *Corpus*  
97 *callosum*, a tissue present in eutherian mammals alone (Aboitiz and Montiel, 2003;  
98 Gazzaniga, 2000; Gazzaniga, 2014; Suarez et al., 2014). The formation of the corpus  
99 callosum has been suggested to be an evolutionary innovation (Mihirshahi, 2006),  
100 highlighting the importance of developing and evolving the process of transfer of information  
101 as an evolutionary stable strategy (ESS). Does this evolutionary jump have correlates in  
102 invertebrates such as insects? How important or necessary is it to have these bilateral  
103 connections in order to perform a task in invertebrates? Insects despite their primitive nature,  
104 are known to be able to perform complex tasks with their rather simple brains consisting of a  
105 few 100,000 neurons. Insect such as ants, wasps, honeybees, especially those belonging to  
106 the order *Hymenoptera* can perform complex tasks involving locating food sources, nesting  
107 sites and foraging back and forth between food source and nest, which would require  
108 coordination of vision, olfaction and navigation (Hansson and Stensmyr, 2011; Kaupp, 2010;  
109 Matsumoto et al., 2012; Roper et al., 2017; Sanes et al., 2010; Su et al., 2009). Bilateral  
110 transfer of information could aid the two lobes of the brain in coordinated decision making  
111 and also allow for one lobe to dominate in specialized tasks over the other, eg. speech,  
112 handedness in mammals, vision, prey escape and motor asymmetries in invertebrates  
113 (Anfora et al., 2011; Corballis, 2009; Corballis, 2017; Frasnelli, 2013; Frasnelli et al., 2014;  
114 Ghirlanda et al., 2009).

115 In free-flying bees (Masuhr et al., 1972) it was reported that side specific olfactory  
116 conditioning does not transfer to the contralateral side. It has been reported that in *Apis*  
117 *mellifera*, if the bee is trained in proboscis extension response (PER) to associate an odor  
118 with reward with stimuli applied to only one antenna, it can be retrieved by applying trained  
119 odor to the untrained contralateral antenna, three hours after training (Sandoz and Menzel,  
120 2001; Strube-Bloss et al., 2016). In these experiments a wall was used to separate the two  
121 antennae and deliver the odor in a side-specific manner, arguing that the blocking the  
122 antenna using a coating influences the context of training and impairs transfer. In their study

123 three hours post training, up to 50% of the bees responded by extending proboscis when the  
124 learned odor and not a novel odor was applied only to the contralateral antenna, suggesting  
125 the presence of a commissure relaying encoded odor specific memory between sides. In  
126 2016, Guo. Y et.al reported the changes on a molecular level in the contralateral side after  
127 training even if the contralateral side was isolated by coating the antenna (Guo et al., 2016).  
128 This study, however, did not show transfer using behaviour, compared to controls trained  
129 with both sides closed. This group used silicon paste to block one antenna while training the  
130 exposed antenna to an odor. Post 24 hours the contra untrained antenna was checked for  
131 retention and transcriptomic analysis was carried out on the bees showing a change in the  
132 contralateral side over time. The results showed an up-regulation in memory and learning  
133 related genes on the untrained side of the brain, indicating a possible lateral transfer of this  
134 learned information and memory. Further, it has been recently reported that response of a  
135 subset of unidentified neurons called the Mushroom body output neurons (MBONs) which  
136 putatively receive input from the Kenyon cells (KCs) of the Mushroom body (MB) can change  
137 in a time dependent manner upon training to an olfactory stimulus (Strube-Bloss et al.,  
138 2016). Further, it was also reported that the memory transferred to the contralateral side to  
139 that of training is odor specific because they could show that the bees discriminated odors  
140 on the untrained side (Strube-Bloss et al., 2016). This would imply a bundle of fibres using  
141 population coding, or a small set of neurons using a complex temporal code connecting the  
142 two sides. Thus a plethora of evidence point to the possible presence of a commissure  
143 dedicated to the relaying of olfactory learned information from one brain lobe to the other. If  
144 this is true then recording the activity of the neurons in this commissure would also provide  
145 us insight into the nature of olfactory code, an exciting prospect.

146 The MBs are a crucial anatomical, higher processing centre of the insect nervous system  
147 that act as a multi-sensory integration unit (Strausfeld , 2002). The MBs have been  
148 suggested to play a central role in memory and retention (Menzel, 2012; Menzel and  
149 Benjamin 2012; Menzel and Muller, 1996). It has been posited that the MBs might play a role

150 in the putative transfer of olfactory information from one lobe to another (Komischke et al.,  
151 2005; Malun et al., 2002). The area adjacent to the  $\alpha$ -lobe has also been suggested to be  
152 the anatomical centres playing role in this transfer process (Komischke et al., 2005, Menzel  
153 and Benjamin, 2012; Menzel and Muller 1996; Okada et al., 2007, Sandoz and Menzel,  
154 2001).

155 Work in our laboratory recently showed the presence of bilateral extrinsic neurons of the  
156 Mushroom body calyx (MB) in a species of grasshopper, *Hieroglyphus banian* (Singh and  
157 Joseph, 2018). In addition, a cluster of lateral horn (LH) neurons in *Schistocerca americana*  
158 have been shown to have a bilateral form bilateral innervation (Gupta and Stopfer, 2012).  
159 Very few correlates for lateral transfer of olfactory memory has been found other than the  
160 above-cited examples in insects. We therefore attempted to look for the neuronal basis of  
161 the phenomenon of bilateral transfer of information in a species of honey bee native to South  
162 East Asia, *Apis dorsata*, also referred to as the giant honey bee or the rock bee which is one  
163 of the crucial pollinators in the region, which is present only in the wild and hasn't so far been  
164 domesticated. In our lab, olfactory pathway and PER conditioning in *Apis dorsata* has been  
165 shown to be very similar to *Apis mellifera* (Mogily et al., 2018). We trained *Apis dorsata* in  
166 PER conditioning to, pairing odor on one side with reward, while the contralateral side is  
167 closed with acrylic paint (Letzkus et al., 2006) and tested for retention on the contralateral  
168 side at 3 hrs post training and found no transfer. While testing the trained side antenna was  
169 closed with acrylic paint and the untrained side was open. Upon repeating this with *Apis*  
170 *mellifera* the results were consistent with our results in *Apis dorsata*. The learning rate and  
171 retention rate when both antennae are open is predictable by a model in which the bee  
172 decides to extend proboscis if either of the two sides decides to extend proboscis  
173 independently. To explain the discrepancy between these results and those from Sandoz  
174 and Menzel (2001) we repeated the procedure by Sandoz and Menzel (2001), using a  
175 partition of the same kind to prevent odor from reaching the untrained antenna and carried  
176 out two control experiments. One where we tested memory on the contralateral side

177 immediately after training itself without a 3 hour delay and found it to be present. Second,  
178 even when the antennal on side being trained was covered with acrylic the bees learned  
179 when the isolation was attempted using the wall partition, indicating that wall is not an  
180 effective way for isolating one antenna from the other in our hands. These results from  
181 learning assays together with the absence of visible bilateral tracts between the olfactory  
182 pathways tract-tracing experiments (Mogily et al., 2018) force us to conclude that the  
183 olfactory pathways on the two sides of the brain learn independently and decides on the  
184 PER behaviour independently.

185

## 186 **Materials and methods:**

### 187 **Bee collection:**

188 *Apis dorsata* foragers were collected at 9 am from the flower sources such as *Turnura*  
189 *subtula*, *Tecoma stans*, *Eucalyptus globulus*. The bees were immobilized by cooling at 4°C  
190 for ten minutes followed by mounting and tethering them in plastic holders using insulation  
191 tape. The bees were allowed to familiarize with this situation for two hours and then training  
192 was carried out. 15 minutes before training generic acrylic paint (Pebeo Studio Acrylics) was  
193 gently applied to one of the two antennae. Two control groups were always maintained  
194 during the training procedure, namely groups with both antenna open and both antennae  
195 blocked. Efficiency of the block was confirmed by the absence of learning in the group with  
196 antennae blocked and PER rates of this group was used as baseline for comparisons.

197

198

### 199 **Side-Specific Training for *Apis dorsata*:**

200 1-hexanol (Sigma Aldrich) was used to train the bees. Geraniol (Sigma Aldrich) was used to  
201 check for discrimination at 3 hours in *Apis mellifera*. Once the acrylic paint dried, the bees  
202 were divided into the three groups, one experimental and two control groups. Each bee

203 placed on the pedestal for 14 seconds followed by the onset of the odor for 4 seconds  
204 (Conditioned stimulus-CS), the 30% sucrose reward (Unconditioned stimulus-US) was  
205 presented to the bee at the 3<sup>rd</sup> second of odor onset and held for 3 seconds. (A 4 second CS  
206 and a 3 second US with 2 second overlap) Odor was delivered as a constant flow of air  
207 applied to the antenna via a 5mm diameter tube placed 4cm away from the antennae. Odor  
208 was driven into the airstream from a 30ml glass bottle by pressurised air controlled by a  
209 valve. Glass bottles containing the aromatic liquid odors, were vacuum sealed and an odor  
210 delivery was carried out by a Teflon tubing connected to the glass bottle. A computer  
211 program controlled the valve and light emitting diodes that signalled the experimenter. In all  
212 the experiments, behaviour and physiology, an air suction exhaust was placed behind the  
213 animal so as to remove the odor after it had blown over the antennae. The bee would  
214 respond to the presence of the US by exhibiting PER (Bitterman et al., 1983; Matsumoto et  
215 al., 2012). A 10 minute inter-trial interval (ITI) was maintained between CS-US pairings and  
216 5 trials were carried out with the entire training procedure lasting for one hour. The bees that  
217 spontaneously exhibited proboscis extensions were eliminated from the study. During the  
218 training if the bees extended their proboscis within 3 seconds of the odor onset (CS) they  
219 were counted as having odor evoked PER. For the bees that were trained with one antenna  
220 and checked with the same antenna (trained check), the acrylic coat was left intact on the  
221 untrained antenna. For the untrained test bees, the block was removed gently post training  
222 and the trained side was coated 15 minutes before testing. The schematic of the set of  
223 experiments is given in (Fig.1 A, B).

224

225

226 To test that the acrylic paint was not causing damage to the antenna, in a group of *Apis*  
227 *dorsata*, the acrylic paint was applied to both the antennae and left for an hour (similar to the  
228 training period). The coat was then peeled off and the bees were trained and tested for PER



229 conditioning (Bitterman et al., 1983). To confirm that the procedure of removing the paint  
230 was not causing a loss of memory by stress, a set of bees were first trained as per the one  
231 antenna blocked training protocol and 15 minutes before the retention test, a coat of acrylic  
232 paint was applied on both the antennae. Once dried, the coat was peeled off from the  
233 trained side antenna. The bees were then tested for retention to the odor memory. In all  
234 cases, identical protocols were followed for *Apis mellifera* in identical experiments.

235

236

237

#### 238 **Checking for Contextual Stimulus:**

239 In order to confirm that coating with paint does not act as a contextual stimulus, *Apis*  
240 *mellifera* were first trained with either antenna covered with a coat. The trained bees were  
241 then divided equally into two groups, one set of bees were tested for retention at 3hrs with  
242 the coat on and the other set were tested for retention with the coat removed.

243

#### 244 **Side-specific training with wall partition:**

245 We carried out the side-specific training for *Apis mellifera* using a wall barrier as specified in  
246 protocol in (Sandoz and Menzel, 2001). A plastic wall (40mm x 50mm) cut in the shape side  
247 profile of the bee; in its holder was used to separate the two antennae. The wall was placed  
248 such that the mandible and proboscis were adjusted slightly to one side depending on which  
249 antenna was to be trained-lobe. The spaces between the wall and bee's head were sealed  
250 with wax. An exhaust vent behind the setup constantly drew air peeling away from the  
251 preparation (Supplementary Fig.1).

252

253

254

255

256

257

258

259

260

261 **Results:**

262 **No lateral transfer of memory in *Apis dorsata*, (A+/0):**

263 The learning rate for bees with one antenna blocked at the end of the 5<sup>th</sup> trial reached 37%  
264 (n=52) (Fig.1 A, C). The learning and retention with both antennae closed was negligible  
265 as expected. The retention test with the untrained antenna was not significant compared to  
266 the condition where both the antenna were closed (p=0.045 Cochran's q=4) consistent with  
267 the absence of lateral transfer of memory. We corrected the value of  $\alpha$  using Bonferroni  
268 correction to a value of  $\alpha=0.044$  .

269

270 **No transfer or discrimination in *Apis mellifera*, (A+/0).**

271 For *Apis mellifera* bees the acquisition reached 95% (n = 59) at the end of the 5<sup>th</sup> trial (Fig.1  
272 B, D). Given the high learning and acquisition rate, only the, both antennae closed control  
273 group was maintained through the training procedures. The learning rate in the contra test  
274 group was nearly zero and not different from both antenna closed group (N=35, p=0.22  
275 q=1.5). The test for retention on the untrained side showed a significant drop in the  
276 percentage of retention (10.5%), this value was close to the retention of the closed antenna  
277 control group (6.8%). There was also no odor discrimination exhibited by the bees which had  
278 contra retention, the bees which responded to 1-Hexanol also responded to 1-Geraniol  
279 (Fig.1 B, D) while those with both antennae open (n=52) showed good discrimination  
280 between Hexanol and Geraniol.

281

282

283

284 **Performance in learning and retention were consistent with the olfactory pathways in**  
285 **the two sides acting independently.**

286 If decision by any of the two sides can cause PER, then one would expect that the  
287 probability of evoking PER should be predictable from the learning rate and retention rates of  
288 one side alone. Sum of probabilities of either of them deciding to evoke PER minus the  
289 probability that both of them would. For the learning rate, the prediction would be ( $2 \times 0.38 -$   
290  $0.38 \times 0.38 = 0.62$ ), approximately equals 0.64, the observed learning rate. Same should follow  
291 for retention ( $2 \times 0.35 - 0.35 \times 0.35 = 0.57$ ) approximately equal 0.56, the observed retention rate.  
292 These predictions match, indicating that the two sides make decisions independently and  
293 indicates no lateral transfer of olfactory learnt memory, while learning or after 3 hours.

294

295

296 ***Apis dorsata* showed high memory retention on trained side, be it left or right, (A+/0):**

297 The learning rate for bees with one antenna blocked at the end of the 5<sup>th</sup> trial reached 38%  
298 (n=34) (Figure 2 A, B). The learning rate of the bees with both antenna open reached 64%  
299 (n=25) at the end of the 5<sup>th</sup> trial and bees with both antennae closed showed 0% for n=39  
300 learning. 92% of the bees that learned retained on the trained side at 3 hours. Open  
301 antenna bees exhibited 87% retention and a 2% retention was seen in bees with both the  
302 antennae closed. The difference in retention rate between the one antenna trained and  
303 tested group and both antennae trained and tested control group was found to be  
304 insignificant ( $p=0.13$ , Cochran's  $q=5.77$ ). A significant difference was found between the  
305 retention of the trained tested and the group of closed antennae bees ( $p=8 \times 10^{-4}$ , Cochran's  
306  $q=11.15$ ) (Figure 2 A). No significant difference was seen between the acquisition and  
307 retention rates of left and right antenna trained bees.

308

309 **The process of peeling away the paint does not shock the bee into forgetting:**

310 For n= 12 *Apis dorsata* we tested whether the coating and uncoating of the acrylic paint  
311 shock the bees into forgetting (Figure 5). To check this we first trained the bees with either

312 one of the antenna blocked. 15 minutes before the retention test we coated the trained  
313 antenna with the paint, waited for it to dry, then uncovered the coat before testing for  
314 retention. The process of removing the coating did not cause the bees to forget the learnt  
315 information and memory retention was 99%.

316

317 **Bees that don't show retention at 3hours on the untrained side do preserve it on the**  
318 **trained side.**

319 To further confirm that lack of memory on the untrained side seen in the trained *Apis*  
320 *mellifera* honey bees is not because of the loss of memory on the trained side, the same  
321 bees that were trained with one antenna and tested with the contra antenna were checked  
322 for trained antenna retention after removing the cover from the trained antenna (Figure 2 B,  
323 D). Retention upon carrying out this paradigm was 82% (n= 53) and significantly above both  
324 antenna closed group ( $p=4.1 \times 10^{-10}$ ,  $q=39$ ) (Figure 2 B). Moreover, the discrimination  
325 between the trained odor 1-Hexenol and the novel odor 1-Geraniol was significant  
326 ( $p=1.4 \times 10^{-8}$ ,  $q=32.1$ ).

327

328 **High learning rate in contra side when using a wall to separate the antennae:**

329 Bees were trained with a wall separating the antenna. Learning rate reached 90% For  
330 (N=10) progressively over the training. When tested, 50% learning was seen on the antenna  
331 on the other side of the wall in the 6<sup>th</sup> trial itself (Fig. 3 A). In the same setup with a wall,  
332 even when the trained antenna was blocked with acrylic paint and the bees trained (Fig. 3 B)  
333 they learned gradually over the 5 trials. They attained a learning percentage of 65% (n=19)  
334 by the 5<sup>th</sup> trial despite having the training antenna blocked. When the untrained antenna was  
335 tested in the 6<sup>th</sup> trial the 65% learning was maintained. This fraction of bees retained the  
336 memory for 3 hours. Despite our best attempts it seemed impossible to robustly separate the  
337 two antennae with a wall.

338

339 **The Acrylic paint block does not act as a contextual stimulus:**

340 Bees were trained with one antenna covered and split into two groups. One was tested  
341 without removing the coating and the other was tested with the coating removed. There is no  
342 observable difference in the percentage of retention between the bees with one antenna  
343 covered and the bees with the antennae uncovered at the time of testing ( $p=0.8$ , Cochran's  
344  $q=0.05$ ). No significant difference was seen in the discrimination either ( $p=0.1$ , Cochran's  
345  $q=2.6$ ). The bees with their antenna uncovered discriminated marginally better than the bees  
346 with the one antenna covered (Fig. 4).

347

348 **Discussion:**

349

350 Connections between the olfactory pathways of the two sides of the brain are prominent in  
351 lower and higher complex vertebrates in the Kingdom Animalia (Suarez et al., 2014).  
352 Bilateral connections have been shown in the visual system of insects (de Lussanet and  
353 Osse, 2012; Roper et al., 2017; Sanes and Zipursky, 2010). From the point of fundamental  
354 behaviour, the bilateral integration of vision would be advantageous especially for optimal  
355 orientation and direction alignment. For insects such as hymenopterans, olfaction is a  
356 dominant sense, imperative for the animal's survival. However, the question remains, of how  
357 pivotal this bilateral integration and transfer of information is in other modalities like olfaction.  
358 Presence of a number of known bilateral neurons involved in PER associative conditioning  
359 with odor supports the possibility of transfer of association from one side of the brain to the  
360 other in the olfactory pathway. One multisensory mushroom body extrinsic neuron, the PE1,  
361 has been shown to display learning-related plasticity with respect to olfactory information in a  
362 time dependent manner (Mauelshagen, 1993; Menzel, 2012; Menzel and Benjamin, 2012).  
363 This neuron has its soma located ventro-medial to the  $\alpha$ -lobe and arborizes adjacent to the  
364 contralateral  $\alpha$ -lobe (Mauelshagen, 1993; Menzel and Muller, 1996; Okada et al., 2007).  
365 Given its anatomic positioning and learning dependant functional plasticity, the question  
366 about whether olfactory learned information with one antenna in honey bees can be

367 retrieved from the contralateral side seemed a possibility. The ventral unpaired median  
368 neuron of the maxillary neuromere (VuMmx1) has its soma located at the subesophageal  
369 ganglion, its branches innervate, the basal lip of the MB, lateral horns, and antennal lobes,  
370 bilaterally (Hammer, 1993; Hammer, 1997; Hammer and Menzel, 1995). This bilateral  
371 neuron has also been shown to be octopaminergic positive and more crucially it displays  
372 plasticity upon olfactory learning (Hammer, 1993; Rein et al., 2013). This neuron can  
373 possibly act as the placeholder for reward bilaterally. However the bilateral transfer of  
374 olfactory memory is claimed to be odor specific and this would require either many neurons  
375 to use a population code or a very few neurons to use a complex temporal code. The  
376 evidence for using either of these by PE1 and VUM neurons is minimal. Thus it is not clear  
377 how the above mentioned neurons can be used to associate reward bilaterally in an odor  
378 specific way.

379

380 If we are to investigate the existence of lateral tracts in the olfactory pathway and  
381 mechanism of lateral we needed to first validate the existence of lateral transfer using a  
382 robust behavioural protocol. Given that this behavioural phenomena was said to have been  
383 observed in *Apis mellifera* (Sandoz and Menzel, 2001; Strube-Bloss et al., 2016) we  
384 attempted to observe the same behavioural output in a native Asian honey bee *A.dorsata*.  
385 However, over the course of our behavioural study, we did not observe lateral memory  
386 transfer and thus diminishing the possibility of finding such tracts in *A.dorsata* and these  
387 results remained consistent when we repeated the experiments using *Apis mellifera*.

388

### 389 **The learning and decision making in the two sides of in *Apis dorsata* are independent**

390 We tested the hypothesis of whether the phenomenon of lateral transfer of olfactory  
391 information exists in *Apis dorsata*. Previous work on *Apis mellifera* suggested that when the  
392 two antennae were separated using a physical separator (plastic wall) and trained using one  
393 side, the learnt information could be retrieved using the contralateral untrained antenna  
394 (Sandoz and Menzel, 2001). Our result in *A.dorsata*, however, was quite contrary and not

395 only did we see negligible transfer olfactory learnt information, but it was also observed that  
396 learning rate with one antenna in use, reduced significantly. We surmise that for this species  
397 of honey bee the learning is independent, implying the parallel working of both antennal  
398 lobes and olfactory pathways. In the same protocol, the *Apis mellifera* learning rate with one  
399 antenna reached up to 95% nearly saturating. In addition neuron tract tracing experiments  
400 from our lab using *Apis dorsata* showed no bilateral connections between the mushroom  
401 body calyx and the contralateral alpha lobe. Further, no connections were seen between the  
402 alpha lobe and contralateral antennal lobes (Mogily et al., 2018). These tract tracing  
403 experiments further strengthened the possibility of each lobe processing olfactory  
404 information independently. This is consistent with our result that the performance with both  
405 the antenna open case can be predicted using performance with one antenna, if  
406 independence of decision making on the two sides is assumed.

407

408

#### 409 **Ecological significance of parallel pathways:**

410 The ecological importance of having parallel olfactory pathways in honey bees is still an  
411 enigma. Decision making for honey bees becomes crucial for each forager as the actions of  
412 the foragers eventually dictate the survival of the hive. Olfaction plays a massive role in the  
413 basic survivability of the honey bee as many of the decisions regarding food source would  
414 be made based on odor. Parallel systems can prove advantageous since the redundancy of  
415 the neural circuit would allow for optimum behaviour to manifest in the absence or loss of  
416 one of the two circuits, hence the bee will be able to perform its task despite the loss of  
417 function of one olfactory pathway. We do not have evidence to see that this happens often in  
418 nature. We hardly ever see bees with one antenna. The additive nature of this same circuit  
419 will prove beneficial as it would aid in improving the decision performance as seen in the  
420 experiments when we compare the performance of one antenna trained versus both trained  
421 case. Taking all this together, the results in both the species were consistent with no transfer  
422 of memory from the trained side to the untrained side and each side learning and retrieving

423 independently. Our results remain consistent with the finding in 1972 by Mahsur et al., that  
424 with respect to olfaction the honey bee seems to use each lobe independently. It is not clear  
425 if there is a set of non-motor, decision neurons, that receive input from both the sides, or  
426 whether the two sides drive the motor neurons and thus the muscles independently and this  
427 requires further investigation. Our results question the possibility of finding robust odor  
428 coding bilateral tracts at higher level in honeybees.

429

430

431

432 **Acknowledgement:** We are grateful to the University Grants Commission India, UPE and  
433 DST-PURSE for funding our research. We are also grateful to CSIR for providing their  
434 support in funding the research via their fellowship and contingency for this work. We would  
435 like to thank the National Institute of Rural development and Panchayati Raj (NIRDPR  
436 Telengana) for providing us *Apis mellifera* honey bees. We would also like to thank Uttam  
437 Krishna Sharma and Sunil Kumar Sethy for their support in procuring and standardizing the  
438 collection of *Apis dorsata*.

439

440

441 **Competing interests:** The authors declare no financial or competing interests.

442

443 **Funding:** Fellowship and contingency provided by Council of Scientific & Industrial  
444 Research (India) (F.No:09/414/(1102)/(2015)-EMR-I dt:03.11.2015), University Grants  
445 Commission (India), Department of Science and Technology (DST)- Promotion of University  
446 Research and Scientific Excellence (PURSE),

447

448

449

450

451

452

453

454



455

456

457 **Paper references:**

- 458 1. Aboitiz . F., Montiel .J. (2003). One hundred million years of interhemispheric  
459 communication: the history of the corpus callosum. *Braz. J. Med. Biol. Res.* 36, 409–  
460 420.
- 461 2. Anfora, G., Rigosi, E., Frasnelli, E., Ruga, V., Trona, F., & Vallortigara, G. (2011).  
462 Lateralization in the invertebrate brain: left-right asymmetry of olfaction in bumble  
463 bee, *Bombus terrestris*. *PLoS One*, 6(4), e18903
- 464 3. Barron, A. B., & Klein, C. (2016). What insects can tell us about the origins of  
465 consciousness. *Proc Natl Acad Sci U S A*, 113(18), 4900-4908
- 466 4. Bitterman, M.E., Menzel, R., Fietz, A., and Schäfer, S. 1983. Classical conditioning of  
467 proboscis extension in honeybees (*Apis mellifera*). *J. Comp. Psychol.* 97: 107-119
- 468 5. Corballis, M. C. (2009). The evolution and genetics of cerebral asymmetry. *Philos*  
469 *Trans R Soc Lond B Biol Sci*, 364(1519), 867-879.
- 470 6. Corballis, M. C. (2017). The Evolution of Lateralized Brain Circuits. *Front Psychol*, 8,  
471 1021.
- 472 7. de Lussanet, M. H. E., & Osse, J. W. M. (2012). An ancestral axial twist explains the  
473 contralateral forebrain and the optic chiasm in vertebrates. *Animal Biology*, 62(2),  
474 193-216.
- 475 8. Frasnelli, E. (2013). Brain and behavioral lateralization in invertebrates. *Front*  
476 *Psychol*, 4, 939
- 477 9. Frasnelli, E., Haase, A., Rigosi, E., Anfora, G., Rogers, L. J., & Vallortigara, G.  
478 (2014). The Bee as a Model to Investigate Brain and Behavioural Asymmetries.  
479 *Insects*, 5(1), 120-138.
- 480 10. Gazzaniga, M. S. (2000). Cerebral specialization and interhemispheric  
481 communication: does the corpus callosum enable the human condition? *Brain*  
482 123, 1293–1326.
- 483 11. Gazzaniga, M. S. (2014). The split-brain: rooting consciousness in biology. *Proc Natl*  
484 *Acad Sci U S A*, 111(51), 18093-18094.
- 485 12. Ghirlanda, S., Frasnelli, E., & Vallortigara, G. (2009). Intraspecific competition and  
486 coordination in the evolution of lateralization. *Philos Trans R Soc Lond B Biol Sci*,  
487 364(1519), 861-866.
- 488 13. Gupta, N., & Stopfer, M. (2012). Functional analysis of a higher olfactory center, the  
489 lateral horn. *J Neurosci*, 32(24), 8138-8148.
- 490 14. Guo, Y., Wang, Z., Li, Y., Wei, G., Yuan, J., Sun, Y., . . . Chen, R. (2016).  
491 Lateralization of gene expression in the honeybee brain during olfactory learning. *Sci*  
492 *Rep*, 6, 34727.
- 493 15. Haase, A., Rigosi, E., Frasnelli, E., Trona, F., Tessarolo, F., Vinegoni, C., . . .  
494 Antolini, R. (2011). A multimodal approach for tracing lateralisation along the  
495 olfactory pathway in the honeybee through electrophysiological recordings, morpho-  
496 functional imaging, and behavioural studies. *Eur Biophys J*, 40(11), 1247-1258.
- 497 16. Hammer, M. (1993). An identified neuron mediates the unconditioned stimulus in  
498 associative olfactory learning in honeybees. *Nature*, 366, 59
- 499 17. Hammer, M. (1997). Neural basis of associative reward learning in honeybees.  
500 *Trends Neurosci*, (20) 245-252.
- 501 18. Hammer, M., Menzel, R (1995). Learning and memory in the honeybee. *J Neurosci*,  
502 15(3), 1617-1630.
- 503 19. Hansson, B. S., & Stensmyr, M. C. (2011). Evolution of insect olfaction. *Neuron*,  
504 72(5), 698-711.
- 505 20. J,Erber., T, H, Masuhr., & R, Menzel. (1980). Localization of short-term memory in the  
506 brain of the bee, *Apis mellifera*. *Physiol Entomol*, (5), 343-358.

- 507 21. Kaupp, U. B. (2010). Olfactory signalling in vertebrates and insects: differences and  
508 commonalities. *Nat Rev Neurosci*, 11(3), 188-200.
- 509 22. Kirschner, S., Kleineidam, C. J., Zube, C., Rybak, J., Grunewald, B., & Rossler, W.  
510 (2006). Dual olfactory pathway in the honeybee, *Apis mellifera*. *J Comp Neurol*,  
511 499(6), 933-952.
- 512 23. Komischke, B., Sandoz, J. C., Malun, D., & Giurfa, M. (2005). Partial unilateral  
513 lesions of the mushroom bodies affect olfactory learning in honeybees *Apis mellifera*  
514 . *Eur J Neurosci*, 21(2), 477-485.
- 515 24. Letzkus, P., Ribi, W. A., Wood, J. T., Zhu, H., Zhang, S. W., & Srinivasan, M. V.  
516 (2006). Lateralization of olfaction in the honeybee *Apis mellifera*. *Curr Biol*, 16(14),  
517 1471-1476.
- 518 25. Masuhr T., Menzel R. (1972) Learning Experiments on the Use of Side — Specific  
519 Information in the Olfactory and Visual System in the Honey Bee (*Apis mellifica*). In:  
520 Wehner R. (eds) Information Processing in the Visual Systems of Anthropods.  
521 Springer, Berlin, Heidelberg.
- 522 26. Mauelshagen J (1993) Neural correlates of olfactory learning in an identified neuron  
523 in the honey bee brain. *J Neurophysiol* 69:609–625.
- 524 27. Malun, D., Giurfa, M., Galizia, C. G., Plath, N., Brandt, R., Gerber, B., & Eisermann,  
525 B. (2002). Hydroxyurea-induced partial mushroom body ablation does not affect  
526 acquisition and retention of olfactory differential conditioning in honeybees. *J*  
527 *Neurobiol*, 53(3), 343-360.
- 528 28. Malun, D., Plath, N., Giurfa, M., Moseleit, A. D., & Muller, U. (2002). Hydroxyurea-  
529 induced partial mushroom body ablation in the honeybee *Apis mellifera*: volumetric  
530 analysis and quantitative protein determination. *J Neurobiol*, 50(1), 31-44.
- 531 29. Matsumoto, Y., Menzel, R., Sandoz, J.-C., & Giurfa, M. (2012). Revisiting olfactory  
532 classical conditioning of the proboscis extension response in honey bees: A step  
533 toward standardized procedures. *Journal of Neuroscience Methods*, 211(1), 159-167.
- 534 30. Menzel, R. (2012). The honeybee as a model for understanding the basis of  
535 cognition. *Nat Rev Neurosci*, 13(11), 758-768.
- 536 31. Menzel, R., & Benjamin, P. R. (2012). In search of the engram in the Honeybee  
537 brain. *Invertebrate Learning and Memory*, Vol. 22, Chapter 29, pages (399-414).
- 538 32. Menzel, R., Muller, U. (1996). Learning and memory in honeybees: From behaviour  
539 to neural substrates. *Annu rev neurosci* (19), 379-404.
- 540 33. Mhrshahi, R. (2006). The corpus callosum as an evolutionary innovation. *J Exp Zool*  
541 *B Mol Dev Evol*, 306(1), 8-17.
- 542 34. Mogily, S., VijayKumar, M., Sethy, S. K., & Joseph, J. (2018). Characterization of the  
543 olfactory system in *Apis dorsata*, an Asian honey bee. *bioRxiv*. doi: 10.1101/420968.
- 544 35. Nawrot, M. P. (2012). Dynamics of sensory processing in the dual olfactory pathway  
545 of the honeybee. *Apidologie*, 43(3), 269-291.
- 546 36. Okada, R., Rybak, J., Manz, G., & Menzel, R. (2007). Learning-related plasticity in  
547 PE1 and other mushroom body-extrinsic neurons in the honeybee brain. *J Neurosci*,  
548 27(43), 11736-11747.
- 549 37. Rein, J., Mustard, J. A., Strauch, M., Smith, B. H., & Galizia, C. G. (2013).  
550 Octopamine modulates activity of neural networks in the honey bee antennal lobe.  
551 *Journal of Comparative Physiology. A, Neuroethology, Sensory, Neural, and*  
552 *Behavioral Physiology*, 199(11), 947–962.
- 553 38. Roper, M., Fernando, C., & Chittka, L. (2017). Insect Bio-inspired Neural Network  
554 Provides New Evidence on How Simple Feature Detectors Can Enable Complex  
555 Visual Generalization and Stimulus Location Invariance in the Miniature Brain of  
556 Honeybees. *PLoS Comput Biol*, 13(2), e1005333.
- 557 39. Royet, J. P., & Plailly, J. (2004). Lateralization of olfactory processes. *Chem Senses*,  
558 29(8), 731-745.
- 559 40. Rybak, J., Menzel, R. (1993). Anatomy of the MB in the honeybee brain the neuronal  
560 connections of the alpha lobe. *J Comp Neurol*, 334(3), 444-465.

- 561 41. Sandoz, J. C., Galizia, C. G., & Menzel, R. (2003). Side-specific olfactory  
562 conditioning leads to more specific odor representation between sides but not within  
563 sides in the honeybee antennal lobes. *Neuroscience*, 120(4), 1137-1148.
- 564 42. Sandoz, J. C., Hammer, M., & Menzel, R. (2002). Side-specificity of olfactory learning  
565 in the honeybee: US input side. *Learn Mem*, 9(5), 337-348.
- 566 43. Sandoz, J. C., & Menzel, R. (2001). Side-specificity of olfactory learning in the  
567 honeybee: generalization between odors and sides. *Learn Mem*, 8(5), 286-294.
- 568 44. Sanes, J. R., & Zipursky, S. L. (2010). Design principles of insect and vertebrate  
569 visual systems. *Neuron*, 66(1), 15-36.
- 570 45. Singh, S., & Joseph, J. (2018). Evolutionarily conserved anatomical and physiological  
571 properties of olfactory pathway till fourth order neurons in a species of grasshopper  
572 (*Hieroglyphus banian*). *bioRxiv*. doi: 10.1101/436626
- 573 46. Strausfeld, N. J. (2002). Organization of the honey bee mushroom body:  
574 representation of the calyx within the vertical and gamma lobes. *J Comp Neurol*,  
575 450(1), 4-33.
- 576 47. Strube-Bloss, M., Nawrot, M. P., Menzel R. (2016). Neural correlates of side-specific  
577 odour memory in mushroom body output neurons. *Proc. R. Soc. B* 283: 20161270.
- 578 48. Su, C. Y., Menuz, K., & Carlson, J. R. (2009). Olfactory perception: receptors, cells,  
579 and circuits. *Cell*, 139(1), 45-59.
- 580 49. Suarez, R., Gobius, I., & Richards, L. J. (2014). Evolution and development of  
581 interhemispheric connections in the vertebrate forebrain. *Front Hum Neurosci*, 8,  
582 497.
- 583 50. Vallortigara, G. (2006). The evolutionary psychology of left and right: costs and  
584 benefits of lateralization. *Dev Psychobiol*, 48(6), 418-427.
- 585  
586  
587  
588  
589  
590  
591  
592  
593  
594  
595  
596  
597  
598  
599  
600  
601  
602  
603

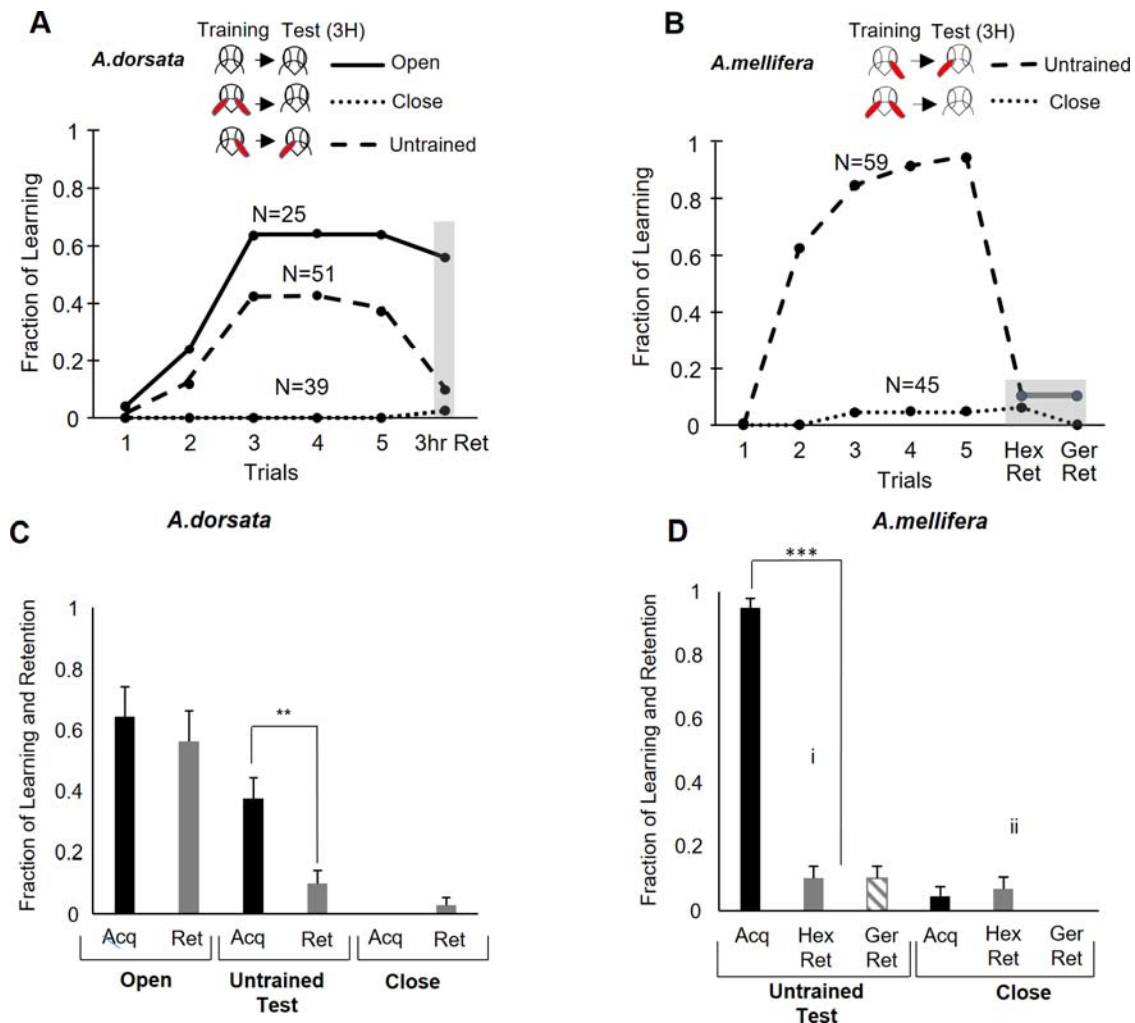

604  
605  
606  
607  
608  
609  
610  
611  
612  
613  
614  
615  
616

**Fig 1: *Apis dorsata* and *Apis mellifera* do not show lateral transfer of olfactory memory** **A)** Testing for lateral transfer at 3 hours (3hr Ret) in *Apis dorsata* shows that memory on the untrained side at 3 hours is nearly zero ( $p=0.045$   $q=4$ ). **B)** *Apis mellifera* bees also did not show any significant lateral transfer at 3 hours ( $p=0.22$   $q=1.5$ ) though they had 95% acquisition. All the bees that responded to 1-hexanol (Hex Ret) responded to 1-geraniol (Ger Ret) on the transferred side at three hours indicating no discrimination ( $p=1$ ). **C)** *Apis dorsata* showed significant difference between the learning (Acq) and retention (Ret) in the side contralateral to the trained, and no significant difference between the (i) untrained retention and (ii) closed antenna control group. The closed antenna group showed 0% learning and 2% retention which may indicate the success rate of our method of coating the antenna for blocking. **D)** *Apis mellifera* showed 95% acquisition but the transfer of memory to (i) contralateral side was similar to the group with (ii) both antenna closed.

617  
  
618  
619  
620  
  
621  
  
622

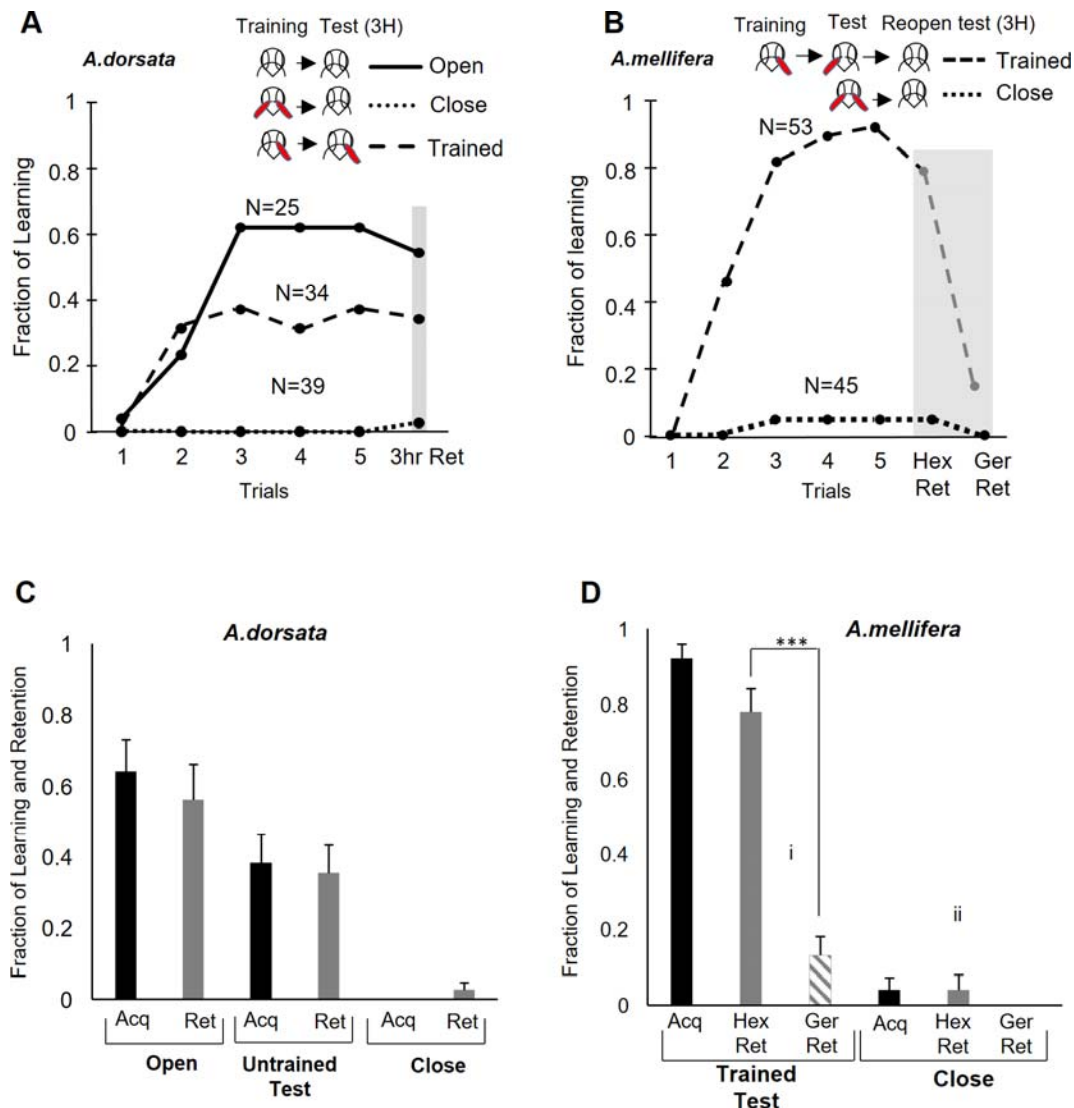

623

624 **Fig 2: Memory is retained on the trained side in *Apis dorsata* and *Apis mellifera*** **A)** *A.*  
625 *dorsata* learned and retained memory after 3 hours (3hr Ret) with one antenna if tested with  
626 the same antenna and also learned and retained if trained and tested with two antennae.  
627 The bees showed significantly lower acquisition and retention with one antenna compared to  
628 two antenna training. **B)** For *Apis mellifera* coating and removing the coat does not affect the  
629 acquired memory on the trained side, difference between the retention of Trained tested and  
630 closed control group was significant ( $p=8 \times 10^{-4}$ ,  $q=11.15$ ). *Apis mellifera* showed 95%  
631 acquisition, and retention to 1-Hexanol was seen to be stable once the trained ipsi antenna  
632 was unblocked at 3 hours ( $p=4.1 \times 10^{-10}$ ,  $q=39$ ). They also showed clear discrimination  
633 between 1-hexanol (Hex Ret) and geraniol (Ger Ret) ( $p=4.6 \times 10^{-8}$ ,  $q=29.87$ ) showing that  
634 the covering and uncovering does not stress the bee and cause memory loss. **C)** *A dorsata*  
635 learned and retained memory after 3 hours with one antenna and two antenna. The  
636 acquisition and retention with two antenna were approximately same as would be predicted  
637 from the rates with one antenna if the olfactory pathway of each sided made decision  
638 independently ( $0.35 \times 2 - 0.35 \times 0.35 = 0.58$  retention) and ( $0.38 \times 2 - 0.38 \times 0.38 = 0.62$  acquisition) **D)**  
639 High acquisition (95%) and retention (0.75) rate in *Apis mellifera* even with one antenna,  
640 made two antenna case not very informative in this task. The retention to 1-Hexanol was  
641 seen to be stable once the trained ipsi antenna was unblocked at 3 hours. As mentioned in

642 figure 3.B, discrimination between 1-hexanol and 1-geraniol was high even after coating and  
643 then removing the coat.

644

645

646

647

648

649

650

651

652

653

654

655

656

657

658

659

660

661

662

663

664

665

666

667

668

669

670

671

672

673

674

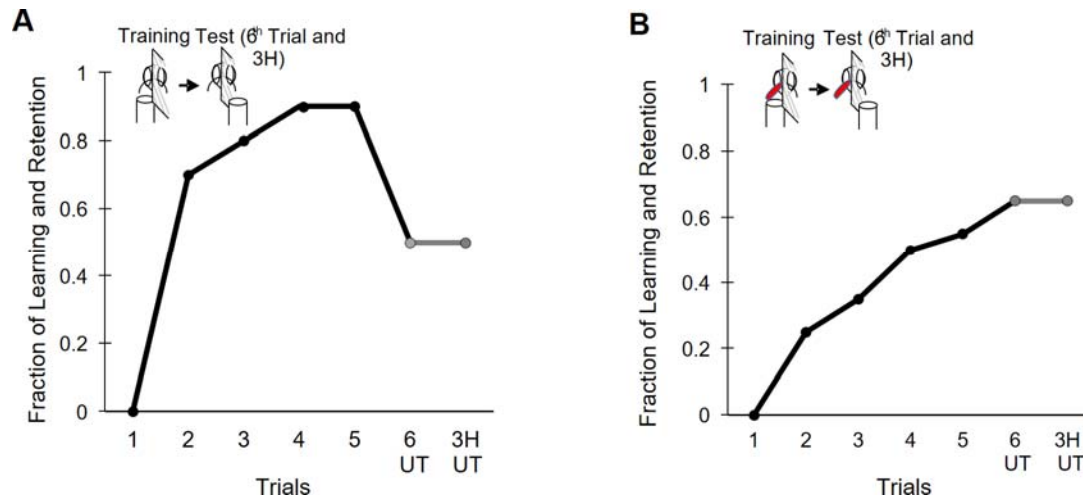

675

676 **Fig 3: Training using a plastic wall to separate the two antennae shows learning in the**  
677 **contralateral side even as training is taking place. A) *Apis mellifera* exhibited PER to the**  
678 **trained odor on the untrained side at the 6<sup>th</sup> trial itself when trained with plastic partition for**  
679 **isolation (denoted UT). This memory was retained on the untrained side at 3hrs post training**  
680 **(denoted 3 UT) (N=10). B) *Apis mellifera* exhibited learning on the trained side even when**  
681 **the trained antenna is insulated with acrylic and with plastic partition used for isolation. 65%**  
682 **retention was seen by the untrained antenna at the 6<sup>th</sup> trial itself (denoted 6 UT), this**  
683 **memory was retained on the untrained side at 3hrs post training (denoted 3H UT) (N=19).**

684

685

686

687

688

689

690

691

692

693

694

695

696

697

698

699

700

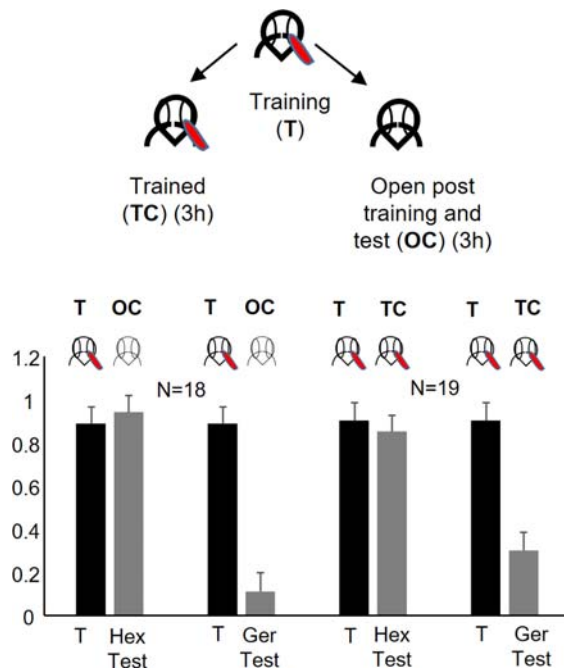

701

702 **Fig 4: Bee does not learn the odor stimuli applied to one side alone as a stimulus**  
703 **different from odor presented to both sides:** *Apis mellifera* bees were trained (T) with one  
704 antenna covered (N=37). At 3 hours the bees were divided randomly, in to two sets. A set of  
705 bees were checked for retention with the block opened (OC) (N=18) and the other set of  
706 bees were checked for retention in the trained condition (TC) (N=19). The bees with both  
707 antennae opened (OC) performed not differently with a 100% and 94% (TC) retention in  
708 each case. The bees with both antenna open and the bees with one antenna covered during  
709 retention test showed good discrimination (Ger Test OC and Ger Test TC).

710

711

712

713

714

715

716

717

718

719

720

721

722

723



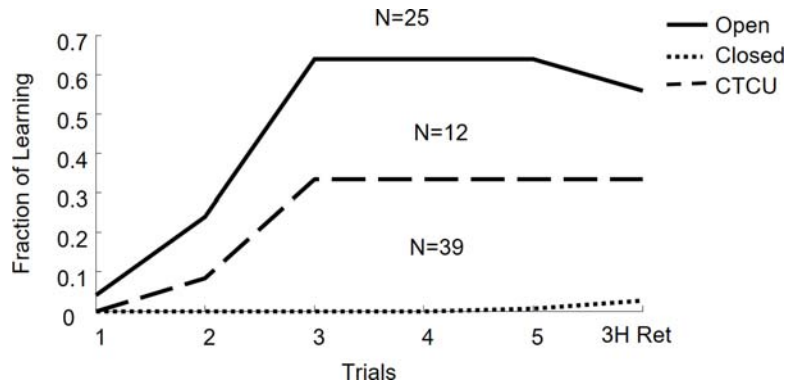

724

725

726 **Fig 5: The process of coating and un-coating does not shock the bee into forgetting**  
727 **or harm the antenna.** In *Apis dorsata* bees, the training antenna was coated with paint just  
728 prior to the 3 hour retention test (3h Ret, N=12). The removing of the coat does not shock  
729 the bees into forgetting the acquired memory as indicated by the 100% retention in the learnt  
730 bees.

731

732

733

734

735

736

737

738

739

740

741

742

743

744

745

746

747
